# Supplementary material for: Dysregulation of lipid metabolism and pathological inflammation in patients with COVID-19
Source: PubMed Central journal article supplement (PMC7859398; doi:10.1038/s41598-021-82426-7), 2021-02-03
Supplement: 41598_2021_82426_MOESM1_ESM.pdf [file 41598_2021_82426_MOESM1_ESM.pdf]

## **Dysregulation of lipid metabolism and pathological inflammation in patients with COVID-19**

Marianna Caterino<sup>1,2°</sup>, Monica Gelzo<sup>1,2°</sup>, Stefano Sol<sup>1,3°</sup>, Roberta Fedele<sup>1</sup>, Anna Annunziata<sup>4</sup>, Cecilia Calabrese<sup>5</sup>, Giuseppe Fiorentino<sup>4</sup>, Maurizio D'Abbraccio<sup>6</sup>, Chiara Dell'Isola<sup>6</sup>, Francesco Maria Fusco<sup>6</sup>, Roberto Parrella<sup>6</sup>, Gabriella Fabbrocini<sup>7</sup>, Ivan Gentile<sup>7</sup>, Immacolata Andolfo<sup>1,2</sup>, Mario Capasso<sup>1,2</sup>, Michele Costanzo<sup>1,2</sup>, Aurora Daniele<sup>1,8</sup>, Emanuela Marchese<sup>1,9</sup>, Rita Polito<sup>1,10</sup>, Roberta Russo<sup>1,2</sup>, Caterina Missero<sup>1,3\*</sup>, Margherita Ruoppolo<sup>1,2,\*</sup> and Giuseppe Castaldo<sup>1,2\*</sup>

A

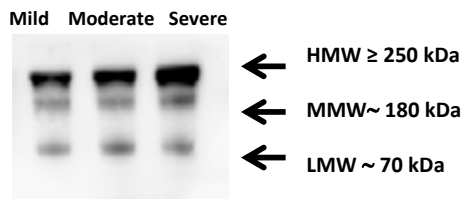

B

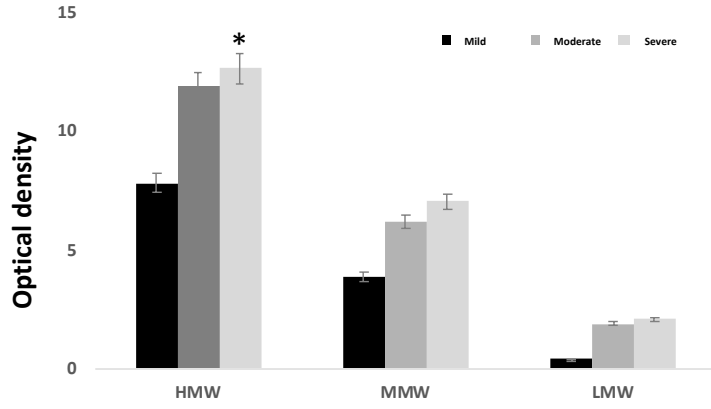

Supplementary Figure 1

**Supplementary Figure 1. Serum Adiponectin oligomers in COVID-19 patient serum (A)** Representative blot image of adiponectin different oligomers (HMW, MMW, LMW) in serum of severe, moderate and mild Covid-19 patients. (B) Graphical representation of pixel quantization of all analysed patients.

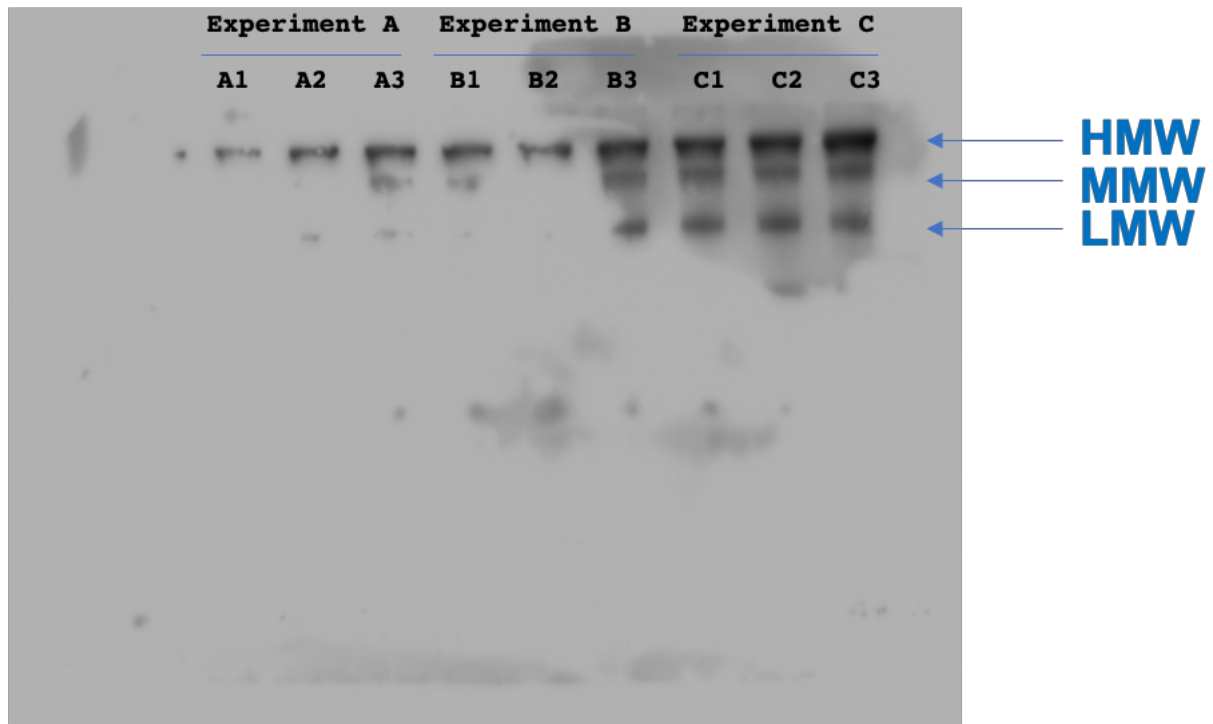

**Supplementary Figure 2**

**Supplementary Figure 2. Serum Adiponectin oligomers in COVID-19 patient serum.** Full-length image of western-blot of the adiponectin different oligomers (HMW, MMW, LMW) in three Covid-19 patient subgroups (A, B, C), including mild (A1, B1 and C1), moderate (A2, B2 and C2) and severe (A3, B3 and C3) serum patients. The western-blot filter was scanned by using Chemidoc MP imaging system (BIORAD) able to provide automatic recognition adjustment of image scanning parameters. The subgroup C was used as representative blot image of adiponectin in Supplementary Figure 1S.
