# Supplementary material for: Dysregulation of lipid metabolism and pathological inflammation in patients with COVID-19
Source: PubMed Central journal article supplement (PMC7859398; doi:10.1038/s41598-021-82426-7), 2021-02-03
Supplement: 41598_2021_82426_MOESM2_ESM.pdf [file 41598_2021_82426_MOESM2_ESM.pdf]

## **Dysregulation of lipid metabolism and pathological inflammation in patients with COVID-19**

Marianna Caterino<sup>1,2°</sup>, Monica Gelzo<sup>1,2°</sup>, Stefano Sol<sup>1,3°</sup>, Roberta Fedele<sup>1</sup>, Anna Annunziata<sup>4</sup>, Cecilia Calabrese<sup>5</sup>, Giuseppe Fiorentino<sup>4</sup>, Maurizio D'Abbraccio<sup>6</sup>, Chiara Dell'Isola<sup>6</sup>, Francesco Maria Fusco<sup>6</sup>, Roberto Parrella<sup>6</sup>, Gabriella Fabbrocini<sup>7</sup>, Ivan Gentile<sup>7</sup>, Immacolata Andolfo<sup>1,2</sup>, Mario Capasso<sup>1,2</sup>, Michele Costanzo<sup>1,2</sup>, Aurora Daniele<sup>1,8</sup>, Emanuela Marchese<sup>1,9</sup>, Rita Polito<sup>1,10</sup>, Roberta Russo<sup>1,2</sup>, Caterina Missero<sup>1,3\*</sup>, Margherita Ruoppolo<sup>1,2,\*</sup> and Giuseppe Castaldo<sup>1,2\*</sup>

**Table 1S. Lipid descriptions**

| Metabolite           | Biochemical Name             | Class             |
|----------------------|------------------------------|-------------------|
| CE(14:0)             | Cholesterol ester (14:0)     | cholesterol ester |
| CE(14:1)             | Cholesterol ester (14:1)     | cholesterol ester |
| CE(15:0)             | Cholesterol ester (15:0)     | cholesterol ester |
| CE(15:1)             | Cholesterol ester (15:1)     | cholesterol ester |
| CE(16:0)             | Cholesterol ester (16:0)     | cholesterol ester |
| CE(16:1)             | Cholesterol ester (16:1)     | cholesterol ester |
| CE(17:0)             | Cholesterol ester (17:0)     | cholesterol ester |
| CE(17:1)             | Cholesterol ester (17:1)     | cholesterol ester |
| CE(18:0)             | Cholesterol ester (18:0)     | cholesterol ester |
| CE(18:1)             | Cholesterol ester (18:1)     | cholesterol ester |
| CE(18:2)             | Cholesterol ester (18:2)     | cholesterol ester |
| CE(18:3)             | Cholesterol ester (18:3)     | cholesterol ester |
| CE(20:0)             | Cholesterol ester (20:0)     | cholesterol ester |
| CE(20:1)             | Cholesterol ester (20:1)     | cholesterol ester |
| CE(20:3)             | Cholesterol ester (20:3)     | cholesterol ester |
| CE(20:4)             | Cholesterol ester (20:4)     | cholesterol ester |
| CE(20:5)             | Cholesterol ester (20:5)     | cholesterol ester |
| CE(22:0)             | Cholesterol ester (22:0)     | cholesterol ester |
| CE(22:1)             | Cholesterol ester (22:1)     | cholesterol ester |
| CE(22:2)             | Cholesterol ester (22:2)     | cholesterol ester |
| CE(22:5)             | Cholesterol ester (22:5)     | cholesterol ester |
| CE(22:6)             | Cholesterol ester (22:6)     | cholesterol ester |
| Hex-Cer(d16:1/22:0)  | Hexosylceramide (d16:1/22:0) | glycosylceramides |
| Hex- Cer(d16:1/24:0) | Hexosylceramide (d16:1/24:0) | glycosylceramides |
| Hex- Cer(d18:1/14:0) | Hexosylceramide (d18:1/14:0) | glycosylceramides |
| Hex- Cer(d18:1/16:0) | Hexosylceramide (d18:1/16:0) | glycosylceramides |
| Hex-Cer(d18:1/18:0)  | Hexosylceramide (d18:1/18:0) | glycosylceramides |
| Hex-Cer(d18:1/18:1)  | Hexosylceramide (d18:1/18:1) | glycosylceramides |
| Hex- Cer(d18:1/20:0) | Hexosylceramide (d18:1/20:0) | glycosylceramides |
| Hex- Cer(d18:1/22:0) | Hexosylceramide (d18:1/22:0) | glycosylceramides |
| Hex- Cer(d18:1/23:0) | Hexosylceramide (d18:1/23:0) | glycosylceramides |
| Hex- Cer(d18:1/24:0) | Hexosylceramide (d18:1/24:0) | glycosylceramides |
| Hex-Cer(d18:1/24:1)  | Hexosylceramide (d18:1/24:1) | glycosylceramides |
| Hex-Cer(d18:1/26:0)  | Hexosylceramide (d18:1/26:0) | glycosylceramides |
| Hex- Cer(d18:1/26:1) | Hexosylceramide (d18:1/26:1) | glycosylceramides |
| Hex- Cer(d18:2/16:0) | Hexosylceramide (d18:2/16:0) | glycosylceramides |
| Hex- Cer(d18:2/18:0) | Hexosylceramide (d18:2/18:0) | glycosylceramides |
| Hex- Cer(d18:2/20:0) | Hexosylceramide (d18:2/20:0) | glycosylceramides |
| Hex-Cer(d18:2/22:0)  | Hexosylceramide (d18:2/22:0) | glycosylceramides |
| Hex-Cer(d18:2/23:0)  | Hexosylceramide (d18:2/23:0) | glycosylceramides |
| Hex-Cer(d18:2/24:0)  | Hexosylceramide (d18:2/24:0) | glycosylceramides |

|                      |                                 |                   |
|----------------------|---------------------------------|-------------------|
| Hex2Cer(d18:1/ 14:0) | Dihexosylceramide (d18:1/14:0)  | glycosylceramides |
| Hex2Cer(d18:1/ 16:0) | Dihexosylceramide (d18:1/16:0)  | glycosylceramides |
| Hex2Cer(d18:1/ 18:0) | Dihexosylceramide (d18:1/18:0)  | glycosylceramides |
| Hex2Cer(d18:1/20:0)  | Dihexosylceramide(d18:1/20:0)   | glycosylceramides |
| Hex2Cer(d18:1/22:0)  | Dihexosylceramide(d18:1/22:0)   | glycosylceramides |
| Hex2Cer(d18:1/ 24:0) | Dihexosylceramide (d18:1/24:0)  | glycosylceramides |
| Hex2Cer(d18:1/ 24:1) | Dihexosylceramide (d18:1/24:1)  | glycosylceramides |
| Hex2Cer(d18:1/ 26:0) | Dihexosylceramide (d18:1/26:0)  | glycosylceramides |
| Hex2Cer(d18:1/26:1)  | Dihexosylceramide(d18:1/26:1)   | glycosylceramides |
| Hex3Cer(d18:1/16:0)  | Trihexosylceramide(d18:1/16:0)  | glycosylceramides |
| Hex3Cer(d18:1/18:0)  | Trihexosylceramide(d18:1/18:0)  | glycosylceramides |
| Hex3Cer(d18:1/ 24:1) | Trihexosylceramide (d18:1/24:1) | glycosylceramides |
| Hex3Cer(d18:1/ 26:1) | Trihexosylceramide (d18:1/26:1) | glycosylceramides |
| Hex3Cer(d18:1_20:0)  | Trihexosylceramide (d18:1_20:0) | glycosylceramides |
| Hex3Cer(d18:1_22:0)  | Trihexosylceramide (d18:1_22:0) | glycosylceramides |
| DG(14:0_14:0)        | Diacylglyceride (14:0_14:0)     | diacylglycerols   |
| DG(14:0_18:1)        | Diacylglyceride (14:0_18:1)     | diacylglycerols   |
| DG(14:0_18:2)        | Diacylglyceride (14:0_18:2)     | diacylglycerols   |
| DG(14:0_20:0)        | Diacylglyceride (14:0_20:0)     | diacylglycerols   |
| DG(14:1_18:1)        | Diacylglyceride (14:1_18:1)     | diacylglycerols   |
| DG(14:1_20:2)        | Diacylglyceride (14:1_20:2)     | diacylglycerols   |
| DG(16:0_16:0)        | Diacylglyceride (16:0_16:0)     | diacylglycerols   |
| DG(16:0_16:1)        | Diacylglyceride (16:0_16:1)     | diacylglycerols   |
| DG(16:0_18:1)        | Diacylglyceride (16:0_18:1)     | diacylglycerols   |
| DG(16:0_18:2)        | Diacylglyceride (16:0_18:2)     | diacylglycerols   |
| DG(16:0_20:0)        | Diacylglyceride (16:0_20:0)     | diacylglycerols   |
| DG(16:0_20:3)        | Diacylglyceride (16:0_20:3)     | diacylglycerols   |
| DG(16:0_20:4)        | Diacylglyceride (16:0_20:4)     | diacylglycerols   |
| DG(16:1_18:0)        | Diacylglyceride (16:1_18:0)     | diacylglycerols   |
| DG(16:1_18:1)        | Diacylglyceride (16:1_18:1)     | diacylglycerols   |
| DG(16:1_18:2)        | Diacylglyceride (16:1_18:2)     | diacylglycerols   |
| DG(16:1_20:0)        | Diacylglyceride (16:1_20:0)     | diacylglycerols   |
| DG(17:0_17:1)        | Diacylglyceride (17:0_17:1)     | diacylglycerols   |
| DG(17:0_18:1)        | Diacylglyceride (17:0_18:1)     | diacylglycerols   |
| DG(18:0_20:0)        | Diacylglyceride (18:0_20:0)     | diacylglycerols   |
| DG(18:0_20:4)        | Diacylglyceride (18:0_20:4)     | diacylglycerols   |
| DG(18:1_18:1)        | Diacylglyceride (18:1_18:1)     | diacylglycerols   |
| DG(18:1_18:2)        | Diacylglyceride (18:1_18:2)     | diacylglycerols   |
| DG(18:1_18:3)        | Diacylglyceride (18:1_18:3)     | diacylglycerols   |
| DG(18:1_18:4)        | Diacylglyceride (18:1_18:4)     | diacylglycerols   |
| DG(18:1_20:0)        | Diacylglyceride (18:1_20:0)     | diacylglycerols   |
| DG(18:1_20:1)        | Diacylglyceride (18:1_20:1)     | diacylglycerols   |
| DG(18:1_20:2)        | Diacylglyceride (18:1_20:2)     | diacylglycerols   |
| DG(18:1_20:3)        | Diacylglyceride (18:1_20:3)     | diacylglycerols   |
| DG(18:1_20:4)        | Diacylglyceride (18:1_20:4)     | diacylglycerols   |
| DG(18:1_22:5)        | Diacylglyceride (18:1_22:5)     | diacylglycerols   |
| DG(18:1_22:6)        | Diacylglyceride (18:1_22:6)     | diacylglycerols   |

|                  |                                      |                      |
|------------------|--------------------------------------|----------------------|
| DG(18:2_18:2)    | Diacylglyceride (18:2_18:2)          | diacylglycerols      |
| DG(18:2_18:3)    | Diacylglyceride (18:2_18:3)          | diacylglycerols      |
| DG(18:2_18:4)    | Diacylglyceride (18:2_18:4)          | diacylglycerols      |
| DG(18:2_20:0)    | Diacylglyceride(18:2_20:0)           | diacylglycerols      |
| DG(18:2_20:4)    | Diacylglyceride (18:2_20:4)          | diacylglycerols      |
| DG(18:3_18:3)    | Diacylglyceride(18:3_18:3)           | diacylglycerols      |
| DG(18:3_20:2)    | Diacylglyceride (18:3_20:2)          | diacylglycerols      |
| DG(21:0_22:6)    | Diacylglyceride (21:0_22:6)          | diacylglycerols      |
| DG(22:1_22:2)    | Diacylglyceride (22:1_22:2)          | diacylglycerols      |
| DG- O(14:0_18:2) | Alkylacylglycerol (O- 18:2_14:0)     | diacylglycerols      |
| DG-O(16:0_18:1)  | Alkylacylglycerol (O-18:1_16:0)      | diacylglycerols      |
| DG-O(16:0_20:4)  | Alkylacylglycerol (O-18:2_18:2)      | diacylglycerols      |
| lysoPC a C14:0   | lysoPhosphatidyl- choline acyl C14:0 | glycerophospholipids |
| lysoPC a C16:0   | lysoPhosphatidyl- choline acyl C16:0 | glycerophospholipids |
| lysoPC a C16:1   | lysoPhosphatidyl- choline acyl C16:1 | glycerophospholipids |
| lysoPC a C17:0   | lysoPhosphatidyl- choline acyl C17:0 | glycerophospholipids |
| lysoPC a C18:0   | lysoPhosphatidyl- choline acyl C18:0 | glycerophospholipids |
| lysoPC a C18:1   | lysoPhosphatidyl- choline acyl C18:1 | glycerophospholipids |
| lysoPC a C18:2   | lysoPhosphatidyl- choline acyl C18:2 | glycerophospholipids |
| lysoPC a C20:3   | lysoPhosphatidyl- choline acyl C20:3 | glycerophospholipids |
| lysoPC a C20:4   | lysoPhosphatidyl- choline acyl C20:4 | glycerophospholipids |
| lysoPC a C24:0   | lysoPhosphatidyl- choline acyl C24:0 | glycerophospholipids |
| lysoPC a C26:0   | lysoPhosphatidyl- choline acyl C26:0 | glycerophospholipids |
| lysoPC a C26:1   | lysoPhosphatidyl- choline acyl C26:1 | glycerophospholipids |
| lysoPC a C28:0   | lysoPhosphatidyl- choline acyl C28:0 | glycerophospholipids |
| lysoPC a C28:1   | lysoPhosphatidyl- choline acyl C28:1 | glycerophospholipids |
| PC aa C24:0      | Phosphatidylcholine diacyl C24:0     | glycerophospholipids |
| PC aa C26:0      | Phosphatidylcholine diacyl C26:0     | glycerophospholipids |
| PC aa C28:1      | Phosphatidylcholine diacyl C28:1     | glycerophospholipids |
| PC aa C30:0      | Phosphatidylcholine diacyl C30:0     | glycerophospholipids |
| PC aa C30:2      | Phosphatidylcholine diacyl C30:2     | glycerophospholipids |
| PC aa C32:0      | Phosphatidylcholine diacyl C32:0     | glycerophospholipids |
| PC aa C32:1      | Phosphatidylcholine diacyl C32:1     | glycerophospholipids |
| PC aa C32:2      | Phosphatidylcholine diacyl C32:2     | glycerophospholipids |
| PC aa C32:3      | Phosphatidylcholine diacyl C32:3     | glycerophospholipids |
| PC aa C34:1      | Phosphatidylcholine diacyl C34:1     | glycerophospholipids |
| PC aa C34:2      | Phosphatidylcholine diacyl C34:2     | glycerophospholipids |
| PC aa C34:3      | Phosphatidylcholine diacyl C34:3     | glycerophospholipids |
| PC aa C34:4      | Phosphatidylcholine diacyl C34:4     | glycerophospholipids |
| PC aa C36:0      | Phosphatidylcholine diacyl C36:0     | glycerophospholipids |
| PC aa C36:1      | Phosphatidylcholine diacyl C36:1     | glycerophospholipids |
| PC aa C36:2      | Phosphatidylcholine diacyl C36:2     | glycerophospholipids |
| PC aa C36:3      | Phosphatidylcholine diacyl C36:3     | glycerophospholipids |
| PC aa C36:4      | Phosphatidylcholine diacyl C36:4     | glycerophospholipids |
| PC aa C36:5      | Phosphatidylcholine diacyl C36:5     | glycerophospholipids |
| PC aa C36:6      | Phosphatidylcholine diacyl C36:6     | glycerophospholipids |
| PC aa C38:0      | Phosphatidylcholine diacyl C38:0     | glycerophospholipids |



|               |                                      |                      |
|---------------|--------------------------------------|----------------------|
| PC ae C42:2   | Phosphatidylcholine acyl-alkyl C42:2 | glycerophospholipids |
| PC ae C42:3   | Phosphatidylcholine acyl-alkyl C42:3 | glycerophospholipids |
| PC ae C42:4   | Phosphatidylcholine acyl-alkyl C42:4 | glycerophospholipids |
| PC ae C42:5   | Phosphatidylcholine acyl-alkyl C42:5 | glycerophospholipids |
| PC ae C44:3   | Phosphatidylcholine acyl-alkyl C44:3 | glycerophospholipids |
| PC ae C44:4   | Phosphatidylcholine acyl-alkyl C44:4 | glycerophospholipids |
| PC ae C44:5   | Phosphatidylcholine acyl-alkyl C44:5 | glycerophospholipids |
| PC ae C44:6   | Phosphatidylcholine acyl-alkyl C44:6 | glycerophospholipids |
| SM (OH) C14:1 | Hydroxysphingomy- eline C14:1        | sphingolipids        |
| SM (OH) C16:1 | Sphingomyeline C16:0                 | sphingolipids        |
| SM (OH) C22:1 | Sphingomyeline C16:1                 | sphingolipids        |
| SM (OH) C22:2 | Hydroxysphingomy-eline C16:1         | sphingolipids        |
| SM (OH) C24:1 | Sphingomyeline C18:0                 | sphingolipids        |
| SM C16:0      | Sphingomyeline C18:1                 | sphingolipids        |
| SM C16:1      | Sphingomyeline C20:2                 | sphingolipids        |
| SM C18:0      | Sphingomyeline C22:3                 | sphingolipids        |
| SM C18:1      | Hydroxysphingomy- eline C22:1        | sphingolipids        |
| SM C20:2      | Hydroxysphingomy- eline C22:2        | sphingolipids        |
| SM C22:3      | Sphingomyeline C24:0                 | sphingolipids        |
| SM C24:0      | Sphingomyeline C24:1                 | sphingolipids        |
| SM C24:1      | Hydroxysphingomy-eline C24:1         | sphingolipids        |
| SM C26:0      | Sphingomyeline C26:0                 | sphingolipids        |
| SM C26:1      | Sphingomyeline C26:1                 | sphingolipids        |
| TG(14:0_32:2) | Triacylglyceride (46:2) w/ FA (14:0) | triacylglycerols     |
| TG(14:0_34:0) | Triacylglyceride (48:0) w/ FA (14:0) | triacylglycerols     |
| TG(14:0_34:1) | Triacylglyceride (48:1) w/ FA (14:0) | triacylglycerols     |
| TG(14:0_34:2) | Triacylglyceride (48:2) w/ FA (14:0) | triacylglycerols     |
| TG(14:0_34:3) | Triacylglyceride (48:3) w/ FA (14:0) | triacylglycerols     |
| TG(14:0_35:1) | Triacylglyceride (49:1) w/ FA (14:0) | triacylglycerols     |
| TG(14:0_35:2) | Triacylglyceride (49:2) w/ FA (14:0) | triacylglycerols     |
| TG(14:0_36:1) | Triacylglyceride (50:1) w/ FA (14:0) | triacylglycerols     |
| TG(14:0_36:2) | Triacylglyceride (50:2) w/ FA (14:0) | triacylglycerols     |
| TG(14:0_36:3) | Triacylglyceride (50:3) w/ FA (14:0) | triacylglycerols     |
| TG(14:0_36:4) | Triacylglyceride (50:4) w/ FA (14:0) | triacylglycerols     |
| TG(14:0_38:4) | Triacylglyceride (52:4) w/ FA (14:0) | triacylglycerols     |
| TG(14:0_38:5) | Triacylglyceride (52:5) w/ FA (14:0) | triacylglycerols     |
| TG(14:0_39:3) | Triacylglyceride (53:3) w/ FA (14:0) | triacylglycerols     |
| TG(16:0_28:1) | Triacylglyceride (44:1) w/ FA (16:0) | triacylglycerols     |
| TG(16:0_28:2) | Triacylglyceride (44:2) w/ FA (16:0) | triacylglycerols     |
| TG(16:0_30:2) | Triacylglyceride (46:2) w/ FA (16:0) | triacylglycerols     |
| TG(16:0_32:0) | Triacylglyceride (48:0) w/ FA (16:0) | triacylglycerols     |
| TG(16:0_32:1) | Triacylglyceride (48:1) w/ FA (16:0) | triacylglycerols     |
| TG(16:0_32:2) | Triacylglyceride (48:2) w/ FA (16:0) | triacylglycerols     |
| TG(16:0_32:3) | Triacylglyceride (48:3) w/ FA (16:0) | triacylglycerols     |
| TG(16:0_33:1) | Triacylglyceride (49:1) w/ FA (16:0) | triacylglycerols     |
| TG(16:0_33:2) | Triacylglyceride (49:2) w/ FA (16:0) | triacylglycerols     |
| TG(16:0_34:0) | Triacylglyceride (50:0) w/ FA (16:0) | triacylglycerols     |



|               |                                      |                  |
|---------------|--------------------------------------|------------------|
| TG(17:1_32:1) | Triacylglyceride (49:2) w/ FA (17:1) | triacylglycerols |
| TG(17:1_34:1) | Triacylglyceride(51:2) w/ FA (17:1)  | triacylglycerols |
| TG(17:1_34:2) | Triacylglyceride (51:3) w/ FA (17:1) | triacylglycerols |
| TG(17:1_34:3) | Triacylglyceride (51:4) w/ FA (17:1) | triacylglycerols |
| TG(17:1_36:3) | Triacylglyceride (53:4) w/ FA (17:1) | triacylglycerols |
| TG(17:1_36:4) | Triacylglyceride (53:5) w/ FA (17:1) | triacylglycerols |
| TG(17:1_36:5) | Triacylglyceride (53:6) w/ FA (17:1) | triacylglycerols |
| TG(17:1_38:5) | Triacylglyceride (55:6) w/ FA (17:1) | triacylglycerols |
| TG(17:1_38:6) | Triacylglyceride (55:7) w/ FA (17:1) | triacylglycerols |
| TG(17:1_38:7) | Triacylglyceride (55:8) w/ FA (17:1) | triacylglycerols |
| TG(17:2_34:2) | Triacylglyceride (51:4) w/ FA (17:2) | triacylglycerols |
| TG(17:2_34:3) | Triacylglyceride (51:5) w/ FA (17:2) | triacylglycerols |
| TG(17:2_36:2) | Triacylglyceride (53:4) w/ FA (17:2) | triacylglycerols |
| TG(17:2_36:3) | Triacylglyceride (53:5) w/ FA (17:2) | triacylglycerols |
| TG(17:2_36:4) | Triacylglyceride (53:6) w/ FA (17:2) | triacylglycerols |
| TG(17:2_38:5) | Triacylglyceride (55:7) w/ FA (17:2) | triacylglycerols |
| TG(17:2_38:6) | Triacylglyceride (55:8) w/ FA (17:2) | triacylglycerols |
| TG(17:2_38:7) | Triacylglyceride (55:9) w/ FA (17:2) | triacylglycerols |
| TG(18:0_30:0) | Triacylglyceride (48:0) w/ FA (18:0) | triacylglycerols |
| TG(18:0_30:1) | Triacylglyceride (48:1) w/ FA (18:0) | triacylglycerols |
| TG(18:0_32:0) | Triacylglyceride(50:0) w/ FA (18:0)  | triacylglycerols |
| TG(18:0_32:1) | Triacylglyceride (50:1) w/ FA (18:0) | triacylglycerols |
| TG(18:0_32:2) | Triacylglyceride (50:2) w/ FA (18:0) | triacylglycerols |
| TG(18:0_34:2) | Triacylglyceride (52:2) w/ FA (18:0) | triacylglycerols |
| TG(18:0_34:3) | Triacylglyceride (52:3) w/ FA (18:0) | triacylglycerols |
| TG(18:0_36:1) | Triacylglyceride (54:1)w/ FA (18:0)  | triacylglycerols |
| TG(18:0_36:2) | Triacylglyceride (54:2) w/ FA (18:0) | triacylglycerols |
| TG(18:0_36:3) | Triacylglyceride (54:3) w/ FA (18:0) | triacylglycerols |
| TG(18:0_36:4) | Triacylglyceride (54:4) w/ FA (18:0) | triacylglycerols |
| TG(18:0_36:5) | Triacylglyceride (54:5) w/ FA (18:0) | triacylglycerols |
| TG(18:0_38:6) | Triacylglyceride (56:6) w/ FA (18:0) | triacylglycerols |
| TG(18:0_38:7) | Triacylglyceride (56:7) w/ FA (18:0) | triacylglycerols |
| TG(18:1_26:0) | Triacylglyceride (44:1) w/ FA (18:1) | triacylglycerols |
| TG(18:1_28:1) | Triacylglyceride (46:2) w/ FA (18:1) | triacylglycerols |
| TG(18:1_30:0) | Triacylglyceride (48:1) w/ FA (18:1) | triacylglycerols |
| TG(18:1_30:1) | Triacylglyceride (48:2) w/ FA (18:1) | triacylglycerols |
| TG(18:1_30:2) | Triacylglyceride (48:3) w/ FA (18:1) | triacylglycerols |
| TG(18:1_31:0) | Triacylglyceride (49:1) w/ FA (18:1) | triacylglycerols |
| TG(18:1_32:0) | Triacylglyceride (50:1) w/ FA (18:1) | triacylglycerols |
| TG(18:1_32:1) | Triacylglyceride (50:2) w/ FA (18:1) | triacylglycerols |
| TG(18:1_32:2) | Triacylglyceride (50:3) w/ FA (18:1) | triacylglycerols |
| TG(18:1_32:3) | Triacylglyceride (50:4) w/ FA (18:1) | triacylglycerols |
| TG(18:1_33:0) | Triacylglyceride (51:1) w/ FA (18:1) | triacylglycerols |
| TG(18:1_33:1) | Triacylglyceride (51:2) w/ FA (18:1) | triacylglycerols |
| TG(18:1_33:2) | Triacylglyceride (51:3) w/ FA (18:1) | triacylglycerols |
| TG(18:1_33:3) | Triacylglyceride (51:4) w/ FA (18:1) | triacylglycerols |
| TG(18:1_34:1) | Triacylglyceride (52:2) w/ FA (18:1) | triacylglycerols |





|               |                                      |                  |
|---------------|--------------------------------------|------------------|
| TG(18:3_34:1) | Triacylglyceride (52:4) w/ FA (18:3) | triacylglycerols |
| TG(18:3_34:2) | Triacylglyceride (52:5) w/ FA (18:3) | triacylglycerols |
| TG(18:3_34:3) | Triacylglyceride (52:6) w/ FA (18:3) | triacylglycerols |
| TG(18:3_35:2) | Triacylglyceride (53:5) w/ FA (18:3) | triacylglycerols |
| TG(18:3_36:1) | Triacylglyceride (54:4) w/ FA (18:3) | triacylglycerols |
| TG(18:3_36:2) | Triacylglyceride (54:5) w/ FA (18:3) | triacylglycerols |
| TG(18:3_36:3) | Triacylglyceride (54:6) w/ FA (18:3) | triacylglycerols |
| TG(18:3_36:4) | Triacylglyceride (54:7) w/ FA (18:3) | triacylglycerols |
| TG(18:3_38:5) | Triacylglyceride (56:8) w/ FA (18:3) | triacylglycerols |
| TG(18:3_38:6) | Triacylglyceride (56:9) w/ FA (18:3) | triacylglycerols |
| TG(20:0_32:3) | Triacylglyceride (52:3) w/ FA (20:0) | triacylglycerols |
| TG(20:0_32:4) | Triacylglyceride (52:4) w/ FA (20:0) | triacylglycerols |
| TG(20:0_34:1) | Triacylglyceride (54:1) w/ FA (20:0) | triacylglycerols |
| TG(20:1_24:3) | Triacylglyceride (44:4) w/ FA (20:1) | triacylglycerols |
| TG(20:1_26:1) | Triacylglyceride (46:2) w/ FA (20:1) | triacylglycerols |
| TG(20:1_30:1) | Triacylglyceride (50:2) w/ FA (20:1) | triacylglycerols |
| TG(20:1_31:0) | Triacylglyceride (51:1) w/ FA (20:1) | triacylglycerols |
| TG(20:1_32:1) | Triacylglyceride (52:2) w/ FA (20:1) | triacylglycerols |
| TG(20:1_32:2) | Triacylglyceride (52:3) w/ FA (20:1) | triacylglycerols |
| TG(20:1_32:3) | Triacylglyceride (52:4) w/ FA (20:1) | triacylglycerols |
| TG(20:1_34:0) | Triacylglyceride (54:1) w/ FA (20:1) | triacylglycerols |
| TG(20:1_34:1) | Triacylglyceride (54:2) w/ FA (20:1) | triacylglycerols |
| TG(20:1_34:2) | Triacylglyceride (54:3) w/ FA (20:1) | triacylglycerols |
| TG(20:1_34:3) | Triacylglyceride (54:4) w/ FA (20:1) | triacylglycerols |
| TG(20:2_32:0) | Triacylglyceride (52:2) w/ FA (20:2) | triacylglycerols |
| TG(20:2_32:1) | Triacylglyceride (52:3) w/ FA (20:2) | triacylglycerols |
| TG(20:2_34:1) | Triacylglyceride (54:3) w/ FA (20:2) | triacylglycerols |
| TG(20:2_34:2) | Triacylglyceride (54:4) w/ FA (20:2) | triacylglycerols |
| TG(20:2_34:3) | Triacylglyceride (54:5) w/ FA (20:2) | triacylglycerols |
| TG(20:2_34:4) | Triacylglyceride (54:6) w/ FA (20:2) | triacylglycerols |
| TG(20:2_36:5) | Triacylglyceride (56:7) w/ FA (20:2) | triacylglycerols |
| TG(20:3_32:0) | Triacylglyceride (52:3) w/ FA (20:3) | triacylglycerols |
| TG(20:3_32:1) | Triacylglyceride (52:4) w/ FA (20:3) | triacylglycerols |
| TG(20:3_32:2) | Triacylglyceride (52:5) w/ FA (20:3) | triacylglycerols |
| TG(20:3_34:0) | Triacylglyceride (54:3) w/ FA (20:3) | triacylglycerols |
| TG(20:3_34:1) | Triacylglyceride (54:4) w/ FA (20:3) | triacylglycerols |
| TG(20:3_34:2) | Triacylglyceride (54:5) w/ FA (20:3) | triacylglycerols |
| TG(20:3_34:3) | Triacylglyceride (54:6) w/ FA (20:3) | triacylglycerols |
| TG(20:3_36:3) | Triacylglyceride (56:6) w/ FA (20:3) | triacylglycerols |
| TG(20:3_36:4) | Triacylglyceride (56:7) w/ FA (20:3) | triacylglycerols |
| TG(20:3_36:5) | Triacylglyceride (56:8) w/ FA (20:3) | triacylglycerols |
| TG(20:4_30:0) | Triacylglyceride (50:4) w/ FA (20:4) | triacylglycerols |
| TG(20:4_32:0) | Triacylglyceride (52:4) w/ FA (20:4) | triacylglycerols |
| TG(20:4_32:1) | Triacylglyceride (52:5) w/ FA (20:4) | triacylglycerols |
| TG(20:4_32:2) | Triacylglyceride (52:6) w/ FA (20:4) | triacylglycerols |
| TG(20:4_33:2) | Triacylglyceride (53:6) w/ FA (20:4) | triacylglycerols |
| TG(20:4_34:0) | Triacylglyceride (54:4) w/ FA (20:4) | triacylglycerols |

|                      |                                      |                  |
|----------------------|--------------------------------------|------------------|
| TG(20:4_34:1)        | Triacylglyceride (54:5) w/ FA (20:4) | triacylglycerols |
| TG(20:4_34:2)        | Triacylglyceride (54:6) w/ FA (20:4) | triacylglycerols |
| TG(20:4_34:3)        | Triacylglyceride (54:7) w/ FA (20:4) | triacylglycerols |
| TG(20:4_35:3)        | Triacylglyceride (55:7) w/ FA (20:4) | triacylglycerols |
| TG(20:4_36:2)        | Triacylglyceride (56:6) w/ FA (20:4) | triacylglycerols |
| TG(20:4_36:3)        | Triacylglyceride (56:7) w/ FA (20:4) | triacylglycerols |
| TG(20:4_36:4)        | Triacylglyceride (56:8) w/ FA (20:4) | triacylglycerols |
| TG(20:4_36:5)        | Triacylglyceride (56:9) w/ FA (20:4) | triacylglycerols |
| TG(20:5_34:0)        | Triacylglyceride (54:5) w/ FA (20:5) | triacylglycerols |
| TG(20:5_34:1)        | Triacylglyceride (54:6) w/ FA (20:5) | triacylglycerols |
| TG(20:5_34:2)        | Triacylglyceride (54:7) w/ FA (20:5) | triacylglycerols |
| TG(20:5_36:2)        | Triacylglyceride (56:7) w/ FA (20:5) | triacylglycerols |
| TG(20:5_36:3)        | Triacylglyceride (56:8) w/ FA (20:5) | triacylglycerols |
| TG(22:0_32:4)        | Triacylglyceride (54:4) w/ FA (22:0) | triacylglycerols |
| TG(22:1_32:5)        | Triacylglyceride (54:6) w/ FA (22:1) | triacylglycerols |
| TG(22:2_32:4)        | Triacylglyceride (54:6) w/ FA (22:2) | triacylglycerols |
| TG(22:3_30:2)        | Triacylglyceride (52:5) w/ FA (22:3) | triacylglycerols |
| TG(22:4_32:0)        | Triacylglyceride (54:4) w/ FA (22:4) | triacylglycerols |
| TG(22:4_32:2)        | Triacylglyceride (54:6) w/ FA (22:4) | triacylglycerols |
| TG(22:4_34:2)        | Triacylglyceride (56:6) w/ FA (22:4) | triacylglycerols |
| TG(22:5_32:0)        | Triacylglyceride (54:5) w/ FA (22:5) | triacylglycerols |
| TG(22:5_32:1)        | Triacylglyceride (54:6) w/ FA (22:5) | triacylglycerols |
| TG(22:5_34:1)        | Triacylglyceride (56:6) w/ FA (22:5) | triacylglycerols |
| TG(22:5_34:2)        | Triacylglyceride (56:7) w/ FA (22:5) | triacylglycerols |
| TG(22:5_34:3)        | Triacylglyceride (56:8) w/ FA (22:5) | triacylglycerols |
| TG(22:6_32:0)        | Triacylglyceride (54:6) w/ FA (22:6) | triacylglycerols |
| TG(22:6_32:1)        | Triacylglyceride (54:7) w/ FA (22:6) | triacylglycerols |
| TG(22:6_34:1)        | Triacylglyceride (56:7) w/ FA (22:6) | triacylglycerols |
| TG(22:6_34:2)        | Triacylglyceride (56:8) w/ FA (22:6) | triacylglycerols |
| TG(22:6_34:3)        | Triacylglyceride (56:9) w/ FA (22:6) | triacylglycerols |
| Cer(d16:1/18:0)      | Ceramide (d16:1/18:0)                | ceramides        |
| Cer(d16:1/20:0)      | Ceramide (d16:1/20:0)                | ceramides        |
| Cer(d16:1/22:0)      | Ceramide (d16:1/22:0)                | ceramides        |
| Cer(d16:1/23:0)      | Ceramide (d16:1/23:0)                | ceramides        |
| Cer(d16:1/24:0)      | Ceramide (d16:1/24:0)                | ceramides        |
| Cer(d18:1/14:0)      | Ceramide (d18:1/14:0)                | ceramides        |
| Cer(d18:1/16:0)      | Ceramide (d18:1/16:0)                | ceramides        |
| Cer(d18:1/18:0 (OH)) | Hydroxyceramide (d18:1/18:0(OH))     | ceramides        |
| Cer(d18:1/18:0)      | Ceramide (d18:1/18:0)                | ceramides        |
| Cer(d18:1/18:1)      | Ceramide (d18:1/18:1)                | ceramides        |
| Cer(d18:1/20:0(OH))  | Hydroxyceramide (d18:1/20:0(OH))     | ceramides        |
| Cer(d18:1/20:0)      | Ceramide (d18:1/20:0)                | ceramides        |
| Cer(d18:1/22:0)      | Ceramide (d18:1/22:0)                | ceramides        |
| Cer(d18:1/23:0)      | Ceramide (d18:1/23:0)                | ceramides        |
| Cer(d18:1/24:0)      | Ceramide (d18:1/24:0)                | ceramides        |
| Cer(d18:1/24:1)      | Ceramide (d18:1/24:1)                | ceramides        |
| Cer(d18:1/25:0)      | Ceramide (d18:1/25:0)                | ceramides        |

|                      |                              |                  |
|----------------------|------------------------------|------------------|
| Cer(d18:1/26:0)      | Ceramide (d18:1/26:0)        | ceramides        |
| Cer(d18:1/26:1)      | Ceramide (d18:1/26:1)        | ceramides        |
| Cer(d18:2/14:0)      | Ceramide (d18:2/14:0)        | ceramides        |
| Cer(d18:2/16:0)      | Ceramide (d18:2/16:0)        | ceramides        |
| Cer(d18:2/18:0)      | Ceramide (d18:2/18:0)        | ceramides        |
| Cer(d18:2/18:1)      | Ceramide (d18:2/18:1)        | ceramides        |
| Cer(d18:2/20:0)      | Ceramide (d18:2/20:0)        | ceramides        |
| Cer(d18:2/22:0)      | Ceramide (d18:2/22:0)        | ceramides        |
| Cer(d18:2/23:0)      | Ceramide (d18:2/23:0)        | ceramides        |
| Cer(d18:2/24:0)      | Ceramide (d18:2/24:0)        | ceramides        |
| Cer(d18:2/24:1)      | Ceramide (d18:2/24:1)        | ceramides        |
|                      | Hydroxydihydrocer- amide     |                  |
| Cer(d18:0/18:0 (OH)) | (d18:0/18:0(OH))             | dihydroceramides |
| Cer(d18:0/18:0)      | Dihydroceramide (d18:0/18:0) | dihydroceramides |
| Cer(d18:0/20:0)      | Dihydroceramide (d18:0/20:0) | dihydroceramides |
| Cer(d18:0/22:0)      | Dihydroceramide (d18:0/22:0) | dihydroceramides |
| Cer(d18:0/24:0)      | Dihydroceramide (d18:0/24:0) | dihydroceramides |
| Cer(d18:0/24:1)      | Dihydroceramide (d18:0/24:1) | dihydroceramides |
|                      | Hydroxydihydrocer- amide     |                  |
| Cer(d18:0/26:1 (OH)) | (d18:0/26:1(OH))             | dihydroceramides |
| Cer(d18:0/26:1)      | Dihydroceramide (d18:0/26:1) | dihydroceramides |

---
